# Supplementary material for: An original synthesis of highly ordered organosilica with a high content of thiol groups
Source: Royal Society of Chemistry journal article supplement (doi:10.1039/b512537e), 2005-11-29

## An original synthesis of highly ordered organosilica with a high content of thiol groups.

Johan Alauzun, Ahmad Mehdi\*, Catherine Reyé, Robert J.P. Corriu\*

*<sup>a</sup>Laboratoire de Chimie Moléculaire et Organisation du Solide, UMR 5637 CNRS, Université Montpellier II, Sciences et Techniques du Languedoc, 34095 Montpellier, France.*

E-mail : [mehdi@univ-montp2.fr](mailto:mehdi@univ-montp2.fr)

### Supplementary Information 1

<sup>29</sup>Si MAS NMR spectra of X2c.

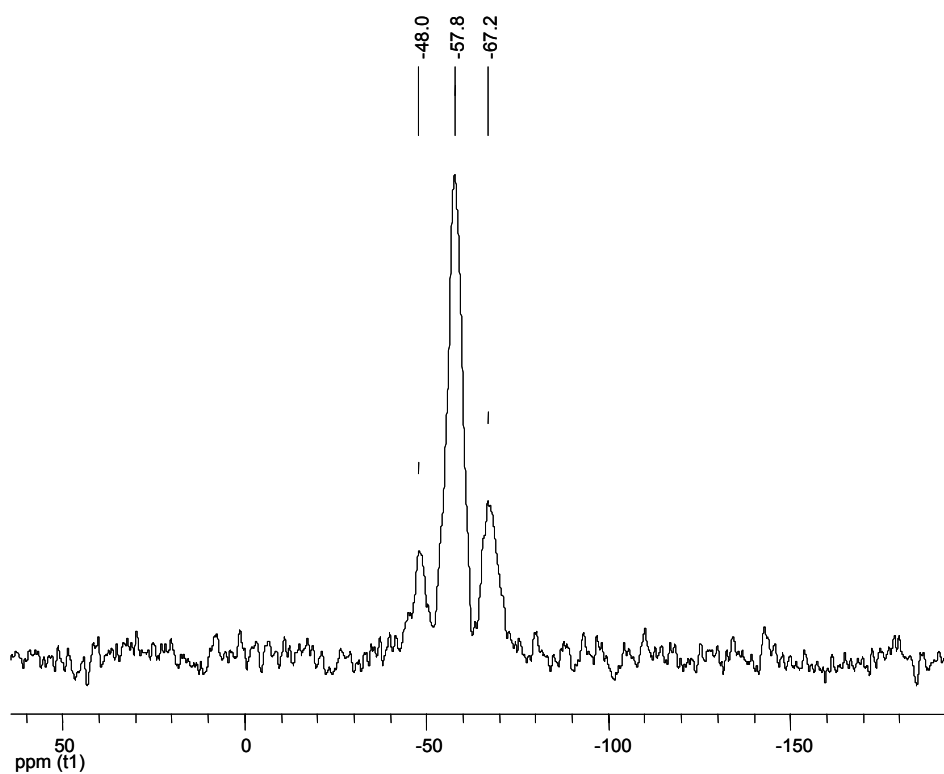

## An original synthesis of highly ordered organosilica with a high content of thiol groups.

Johan Alauzun, Ahmad Mehdi\*, Catherine Reyé, Robert J.P. Corriu\*

*<sup>a</sup>Laboratoire de Chimie Moléculaire et Organisation du Solide, UMR 5637 CNRS, Université Montpellier II, Sciences et Techniques du Languedoc, 34095 Montpellier, France.*

E-mail : [mehdi@univ-montp2.fr](mailto:mehdi@univ-montp2.fr)

### Supplementary Information 2

XRD patterns of X2a and X2b

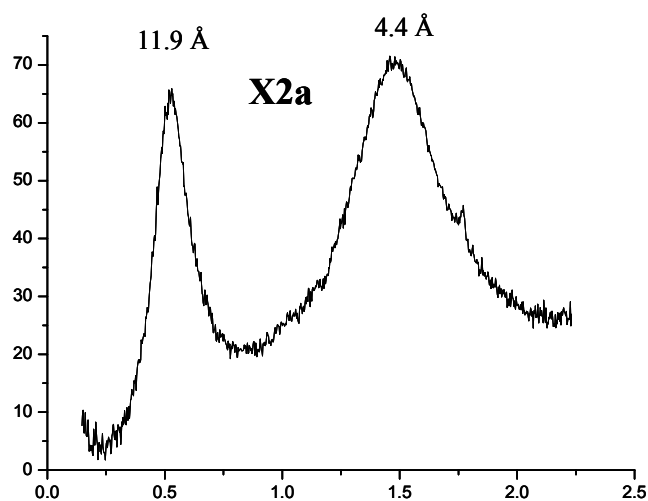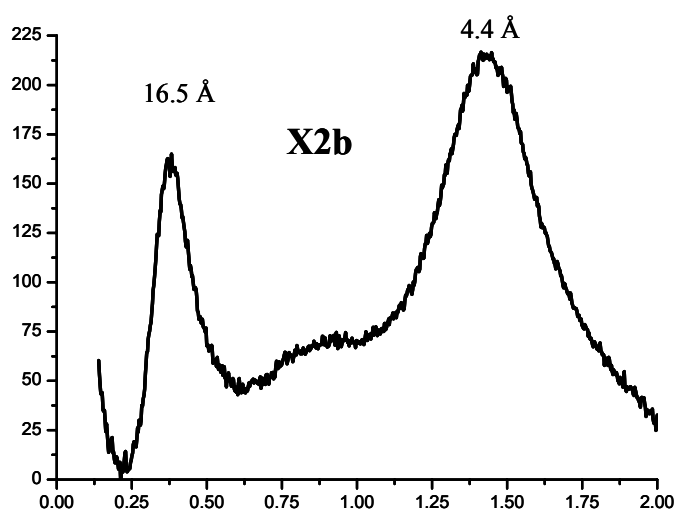

## **An original synthesis of highly ordered organosilica with a high content of thiol groups.**

**Johan Alauzun, Ahmad Mehdi\*, Catherine Reyé, Robert J.P. Corriu\***

*<sup>a</sup>Laboratoire de Chimie Moléculaire et Organisation du Solide, UMR 5637 CNRS, Université Montpellier II, Sciences et Techniques du Languedoc, 34095 Montpellier, France.*

E-mail : [mehdi@univ-montp2.fr](mailto:mehdi@univ-montp2.fr)

### **Supplementary Information 3**

XRD pattern of **X4c**

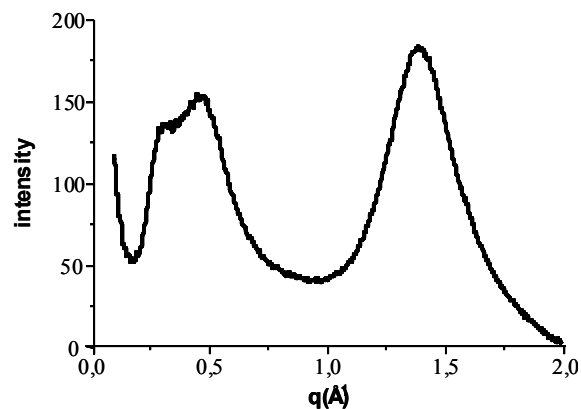

Supplement: b512537e.pdf [file b512537e.pdf]
